# Supplementary material for: Entomological surveillance and spatiotemporal risk assessment of sand fly-borne diseases in Cyprus
Source: PubMed Central journal article supplement (PMC10787173; doi:10.1016/j.crpvbd.2023.100152), 2023-11-06
Supplement: mmc1.pdf [file mmc1.pdf]

## Supplementary Figures S1-S3

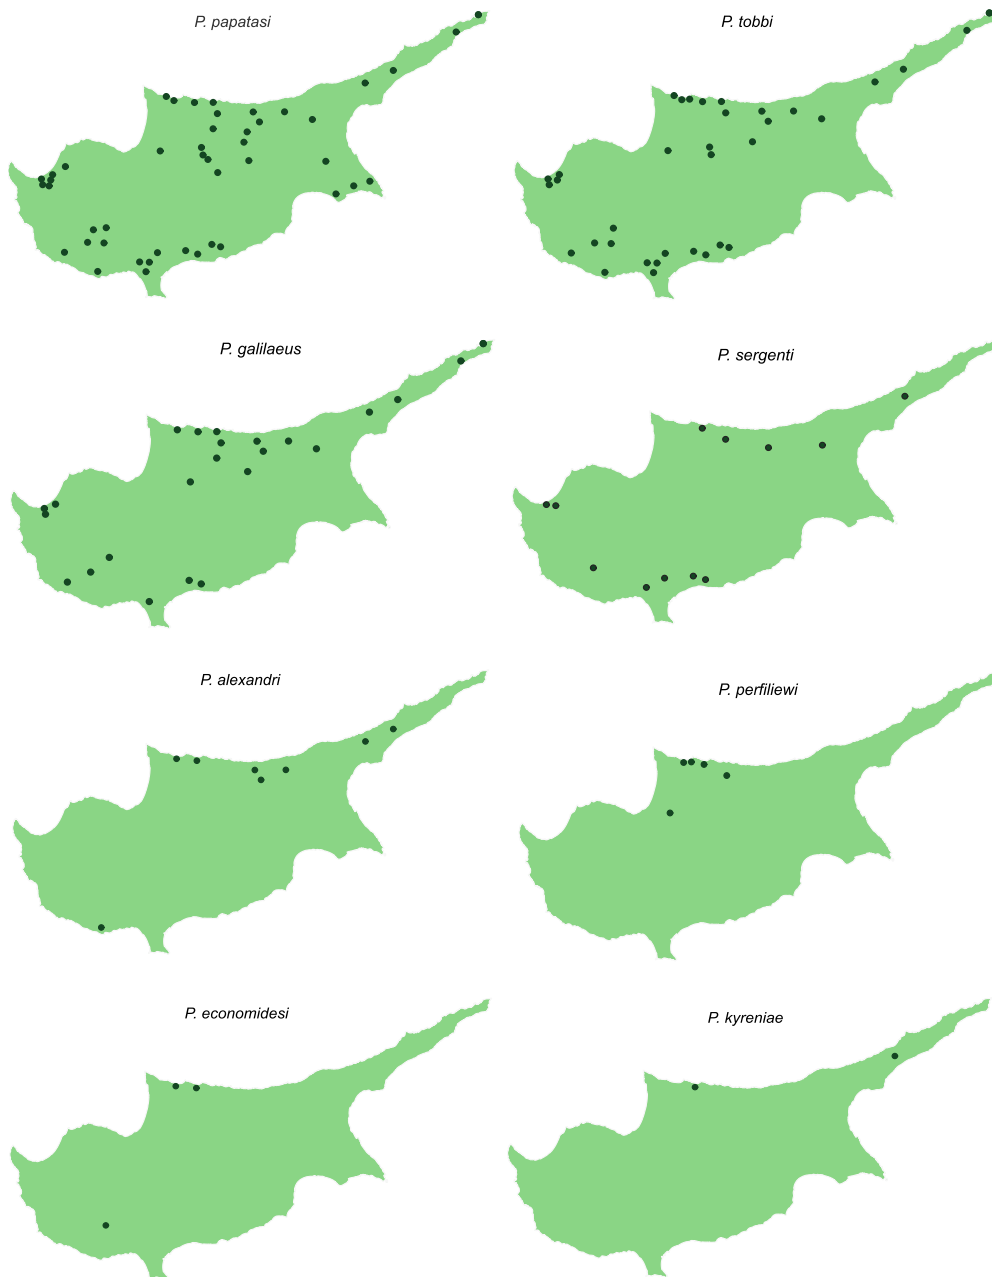

**Supplementary Figure S1.** Records of phlebotomine subspecies in Cyprus between 1946 and 2023. The marks represent the locations of the centroids of the administrative regions where the species are detected.

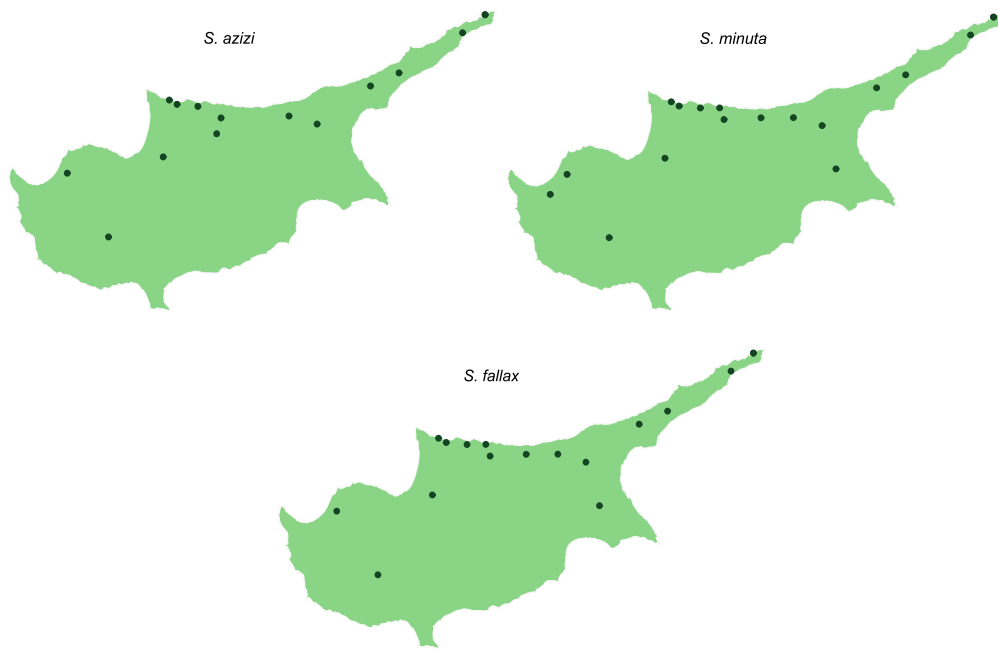

**Supplementary Figure S2.** Records of *Sergentomyia* subspecies in Cyprus between 1946 and 2023. The marks represent the locations of the centroids of the administrative regions where the species are detected.

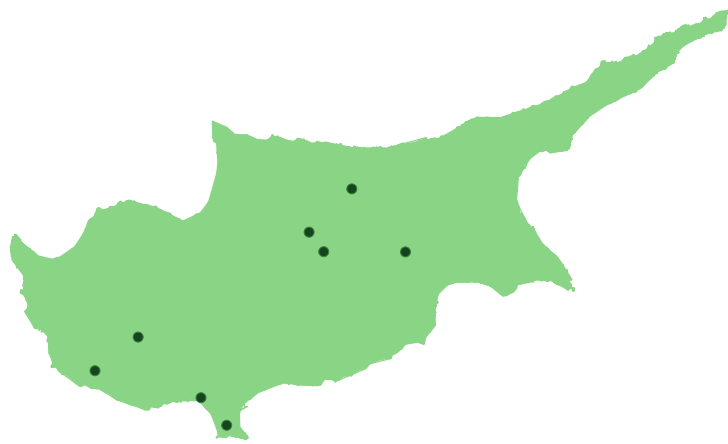

**Supplementary Figure S3.** Sand fly sampling locations.
