# Supplementary material for: Entomological surveillance and spatiotemporal risk assessment of sand fly-borne diseases in Cyprus
Source: PubMed Central journal article supplement (PMC10787173; doi:10.1016/j.crpvbd.2023.100152), 2023-11-06
Supplement: mmc2.pdf [file mmc2.pdf]

## Supplementary Text S1

The Python code to perform the simulations described in Methods (2.3).

```
### Python Code File for CRPVBD Manuscript
### Entomological surveillance and spatiotemporal risk assessment
### of sand fly-borne diseases in Cyprus
###
### Copyright (C) 2023 Kamil Erguler
###
### This program is free software: you can redistribute it
### and/or modify it under the terms of the GNU General
### Public License as published by the Free Software Foundation,
### version 3 of the License.
###
### This program is distributed in the hope that it will be useful,
### but WITHOUT ANY WARRANTY; without even the implied warranty of
### MERCHANTABILITY or FITNESS FOR A PARTICULAR PURPOSE. See the
### GNU General Public License for more details
### (<https://www.gnu.org/licenses/>).

import numpy
import xarray
import albopictus as aa

# Uncomment the following to perform simulations
# over primary habitats
location = 'STENI'
# Uncomment the following to perform simulations
# over secondary habitats
# location = 'GERI'

# Adult female vectors should be extracted from model output
key = 'colnvAf'
```

```

# The model and parameter configurations are available in
# the albopictus package
model = aa.sand
parmat = numpy.array(aa.param['sand'][location]['papatasi']['combinedA']).copy()

# The meteorological datasets are available at
# Zenodo (10.5281/zenodo.8413232)
ds_T2 =
xarray.open_dataset("wrf_met_daily_avg_2015_curvfix_rlonlat_remapycon_NCL_T2_corine-
grid_rbil_r0.0215_2.nc")
ds_RH =
xarray.open_dataset("wrf_met_daily_avg_2015_curvfix_rlonlat_remapycon_NCL_RH2_corine-
grid_rbil_r0.0215_2.nc")
lons = ds_T2.lon.values[:]
lats = ds_T2.lat.values[:]
latloni = numpy.array([[lat,lon] for lat in range(len(lats)) for lon in range(len(lons))])
mat_T2 = ds_T2.T2.values[:,:::]
mat_RH = ds_RH.RH2.values[:,:::]

# Prepare the matrix to store the model output
sims = numpy.ndarray((365,lats.shape[0],lons.shape[0]),dtype=numpy.float64)
sims[:,:::] = numpy.nan

# The following routine prepares the environmental data
# for a given grid cell
def prepare(lati,loni):
    return {
        'dates': numpy.arange(mat_T2.shape[0]),
        'temp': mat_T2[:,lati,loni],
        'RH': mat_RH[:,lati,loni] * 0.01,
        'envar':
            numpy.hstack([
                mat_T2[:,lati,loni],
                mat_RH[:,lati,loni] * 0.01,
                numpy.repeat(0, mat_T2.shape[0])
            ])
    }

```

```
    ])  
}
```

```
# The following routine performs a simulation for a given  
# meteorological dataset (temperature and relative humidity)
```

```
def simClim(clim,pr,key='colegg'):  
    rmean = []  
    for clm in clim:  
        if pr.ndim==1:  
            r = model.simPar(clm,pr)  
        else:  
            r = model.simParMat(clm,pr,boil={key:[]})  
        if (r.__class__.__name__!='dict' or not r['success']):  
            return []  
        if len(rmean)==0:  
            rmean = numpy.array(r[key],ndmin=2)  
        else:  
            rmean = numpy.vstack([rmean,r[key]])  
    return numpy.mean(rmean,axis=0)
```

```
# The following loop initiates the simulation for each grid cell  
# available in the meteorological datasets
```

```
for lati,loni in latiloni:  
    clim = prepare(lati,loni)  
    if not numpy.all(numpy.isnan(clim['temp'])):  
        print("Processing (%g,%g)" %(lons[loni],lats[lati]))  
        #  
        sim = simClim([clim],parmat,key=key)  
        sims[:,lati,loni] = sim
```

```
# The output is available at Zenodo (10.5281/zenodo.8413593)
```

```
filename = "mech_model_STENI_papatasi_combinedA_%s_posterior_mean_%s.npy"  
%(key,location)  
numpy.save(filename, sims)
```
