# Supplementary material for: Entomological surveillance and spatiotemporal risk assessment of sand fly-borne diseases in Cyprus
Source: PubMed Central journal article supplement (PMC10787173; doi:10.1016/j.crpvbd.2023.100152), 2023-11-06
Supplement: mmc3.pdf [file mmc3.pdf]

**Supplementary Table S1.** Results of the sand fly sampling performed between 2013 and 2020 through an inter-institutional collaboration.

| Group     | Location            | Longitude   | Latitude    | Year | Total | Phlebotomus                 | Artemievus                   | Paraphlebotomus             |                              | Larrousiuscc                 |                          |                              |                              | Adlerius              |                               | Transphlebotomus            |                            |                                | Sergentomyia                 |                            |                           |                            |                             |                               |
|-----------|---------------------|-------------|-------------|------|-------|-----------------------------|------------------------------|-----------------------------|------------------------------|------------------------------|--------------------------|------------------------------|------------------------------|-----------------------|-------------------------------|-----------------------------|----------------------------|--------------------------------|------------------------------|----------------------------|---------------------------|----------------------------|-----------------------------|-------------------------------|
|           |                     |             |             |      |       | <i>Phlebotomus papatasi</i> | <i>Phlebotomus alexandri</i> | <i>Phlebotomus sergenti</i> | <i>Phlebotomus jacusieli</i> | <i>Phlebotomus perfliewi</i> | <i>Phlebotomus tobbi</i> | <i>Phlebotomus galilaeus</i> | <i>Phlebotomus neglectus</i> | <i>Larrousius sp.</i> | <i>Phlebotomus halepensis</i> | <i>Phlebotomus kyreniae</i> | <i>Phlebotomus kilicki</i> | <i>Phlebotomus economidesi</i> | <i>Phlebotomus mascittii</i> | <i>Sergentomyia minuta</i> | <i>Sergentomyia azizi</i> | <i>Sergentomyia fallax</i> | <i>Sergentomyia dentata</i> | <i>Sergentomyia antennata</i> |
|           |                     |             |             |      |       | 456                         | 2                            | 11                          |                              | 3                            | 50                       | 64                           | 1                            |                       |                               |                             |                            |                                | 291                          |                            | 35                        | 20                         |                             | 168                           |
| Martinou  | EPISKOPI (LEMESOU)  | 32.88360256 | 34.6734099  | 2015 | 3     | 3                           |                              |                             |                              |                              |                          |                              |                              |                       |                               |                             |                            |                                |                              |                            |                           |                            |                             |                               |
| Martinou  | EPISKOPI (LEMESOU)  | 32.88360256 | 34.6734099  | 2017 | 18    | 18                          |                              |                             |                              |                              |                          |                              |                              |                       |                               |                             |                            |                                |                              |                            |                           |                            |                             |                               |
| Martinou  | EPISKOPI (LEMESOU)  | 32.88360256 | 34.6734099  | 2018 | 118   | 118                         |                              |                             |                              |                              |                          |                              |                              |                       |                               |                             |                            |                                |                              |                            |                           |                            |                             |                               |
| Martinou  | EPISKOPI (LEMESOU)  | 32.88360256 | 34.6734099  | 2020 | 35    | 35                          |                              |                             |                              |                              |                          |                              |                              |                       |                               |                             |                            |                                |                              |                            |                           |                            |                             |                               |
| Martinou  | ATHIENOU            | 33.54268773 | 35.0593096  | 2020 | 17    | 17                          |                              |                             |                              |                              |                          |                              |                              |                       |                               |                             |                            |                                |                              |                            |                           |                            |                             |                               |
| Martinou  | AKROTIRI            | 32.96644604 | 34.60035084 | 2020 | 6     | 6                           |                              |                             |                              |                              |                          |                              |                              |                       |                               |                             |                            |                                |                              |                            |                           |                            |                             |                               |
| Ozbel     | MANDRES (LEFKOSIAS) | 33.36976699 | 35.22571666 | 2018 | 207   | 197                         | 2                            |                             |                              | 2                            |                          | 1                            |                              |                       |                               |                             |                            |                                | 1                            |                            | 2                         | 2                          |                             |                               |
| Antoniou* | AGIOI TRIMITHIAS    | 33.23206695 | 35.11148109 | 2018 | 529   | 47                          |                              | 6                           |                              | 3                            | 2                        |                              |                              |                       |                               |                             |                            |                                | 272                          |                            | 33                        |                            |                             | 166                           |
| Antoniou* | ANARITA             | 32.54187123 | 34.7450802  | 2013 | 52    | 5                           |                              |                             |                              | 8                            | 31                       |                              |                              |                       |                               |                             |                            |                                | 4                            |                            |                           | 4                          |                             |                               |
| Antoniou* | PSIMOLOFOU          | 33.27927353 | 35.05986102 | 2013 | 15    | 4                           |                              |                             |                              | 1                            |                          |                              |                              |                       |                               |                             |                            |                                |                              |                            |                           | 9                          |                             | 1                             |
| Antoniou* | SALAMIOU            | 32.68094708 | 34.83415058 | 2013 | 101   | 6                           |                              | 5                           |                              | 37                           | 33                       |                              |                              |                       |                               |                             |                            |                                | 14                           |                            |                           | 5                          |                             | 1                             |

\*A small fraction of these samples was used in the molecular study published by Pavlou et al. (2022).

Pavlou, C., Dokianakis, E., Tsirigotakis, N., Christodoulou, V., Özbel, Y., Antoniou, M., & Poulakakis, N. (2022). A molecular phylogeny and phylogeography of Greek Aegean Island sand flies of the genus *Phlebotomus* (Diptera: Psychodidae). *Arthropod Systematics & Phylogeny*, 80, 137–154.
